# Supplementary material for: Spatial-Temporal Variations for Pollution Assessment of Heavy Metals in Hengshui Lake of China
Source: MDPI journal article supplement (doi:10.3390/w14030458), 2022-02-02
Supplement: s1 [file s1]

## Article

# Spatial–Temporal Variations for Pollution Assessment of Heavy Metals in Hengshui Lake of China

Weiwei Liu <sup>1,2</sup>, Ziliang Guo <sup>1,2,\*</sup>, Henian Wang <sup>1,2</sup>, Daan Wang <sup>1,2</sup> and Manyin Zhang <sup>1,2,\*</sup>

<sup>1</sup> Beijing Key Laboratory of Wetland Ecological Function and Restoration, Institute of Wetland Research, Chinese Academy of Forestry, Beijing 100091, China; weiweiliu@163.com (W.L.); wanghenian2006@126.com (H.W.); daan\_wang@mail.bnu.edu.cn (D.W.)

<sup>2</sup> National Ecosystem Research Station of Hengshui Wetland, Hengshui 053000, China

\* Correspondence: shengtai2007@126.com (Z.G.); cneco@126.com (M.Z.)

## Supplementary Material

**Table S1.** Standards for single factor pollution index and Nemero comprehensive pollution index.

| Single factor pollution index ( $P_i$ ) | Pollution level  | Nemero comprehensive pollution index ( $P_n$ ) | Pollution level  |
|-----------------------------------------|------------------|------------------------------------------------|------------------|
| $P_i \leq 1$                            | Non pollution    | $P_n \leq 1$                                   | Non pollution    |
| $1 < P_i \leq 2$                        | Light pollution  | $1 < P_n \leq 2$                               | Light pollution  |
| $2 < P_i \leq 3$                        | Medium pollution | $2 < P_n \leq 3$                               | Medium pollution |
| $P_i > 3$                               | Severe pollution | $P_n > 3$                                      | Severe pollution |

**Table S2.** Classes of enrichment factors.

| Pollution level | EF                | Enrichment degree      |
|-----------------|-------------------|------------------------|
| I               | $EF \leq 1$       | Non enrichment         |
| II              | $1 < EF \leq 2$   | Light enrichment       |
| III             | $2 < EF \leq 5$   | Medium enrichment      |
| IV              | $5 < EF \leq 20$  | Significant enrichment |
| V               | $20 < EF \leq 40$ | Strong enrichment      |
|                 | $EF > 40$         | Very strong enrichment |

**Table S3.** Classes of potential ecological risk indices of heavy metals.

| Risk factor ( $E_r^i$ ) | Potential ecological risk degree       | Potential ecological risk index ( $PRI$ ) | Ecological risk degree       |
|-------------------------|----------------------------------------|-------------------------------------------|------------------------------|
| $E_r^i < 40$            | Low potential ecological risk          | $PRI < 150$                               | Low ecological risk          |
| $40 \leq E_r^i < 80$    | Moderate potential ecological risk     | $150 \leq PRI < 300$                      | Moderate ecological risk     |
| $80 \leq E_r^i < 160$   | Considerable potential ecological risk | $300 \leq PRI < 600$                      | Considerable ecological risk |
| $160 \leq E_r^i < 320$  | High potential ecological risk         | $PRI \geq 600$                            | Very high ecological risk    |
| $E_r^i \geq 320$        | Very high potential ecological risk    |                                           |                              |

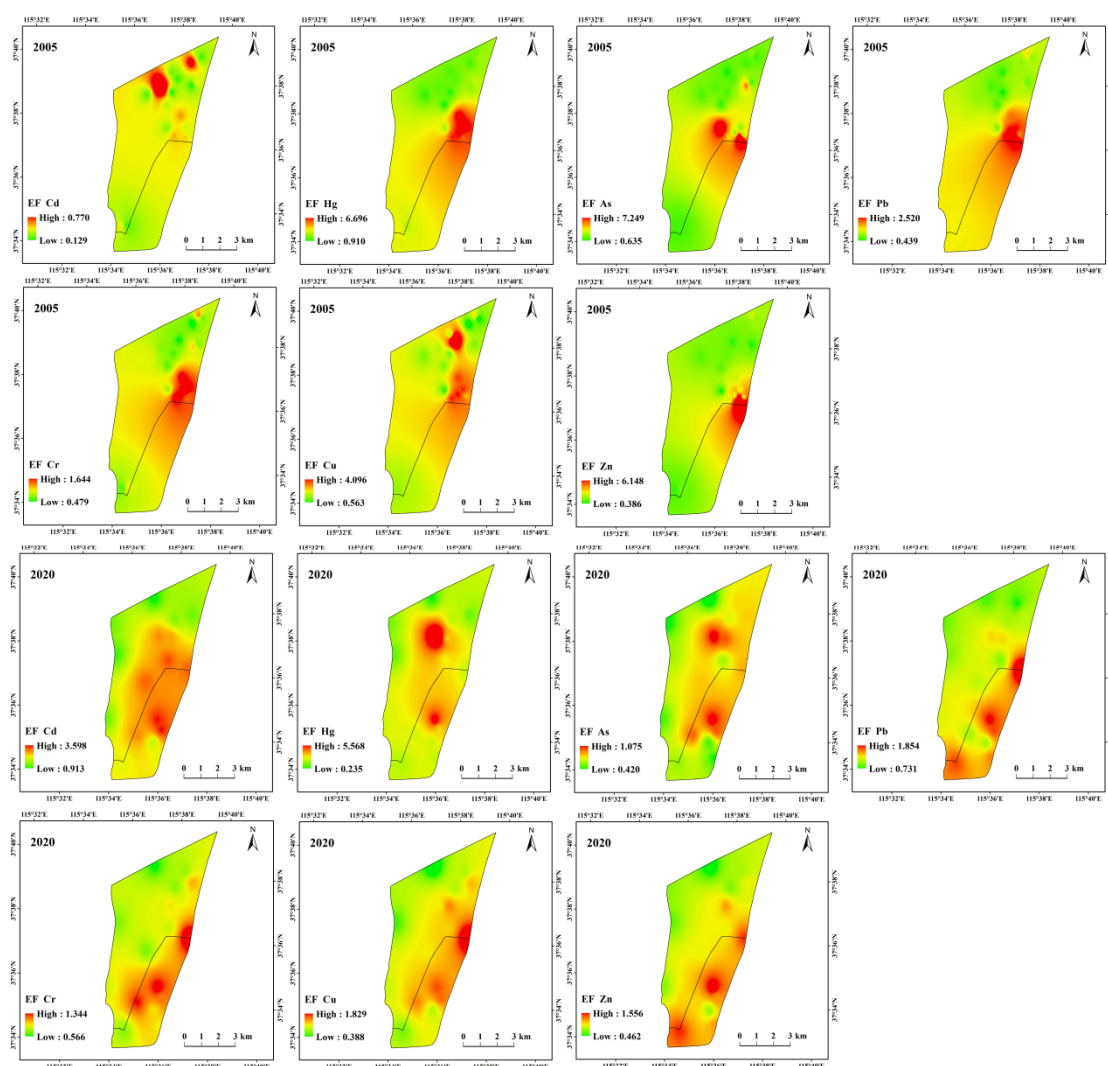

Figure S1. Distribution of enrichment factor for different heavy metal in Hengshui Lake.

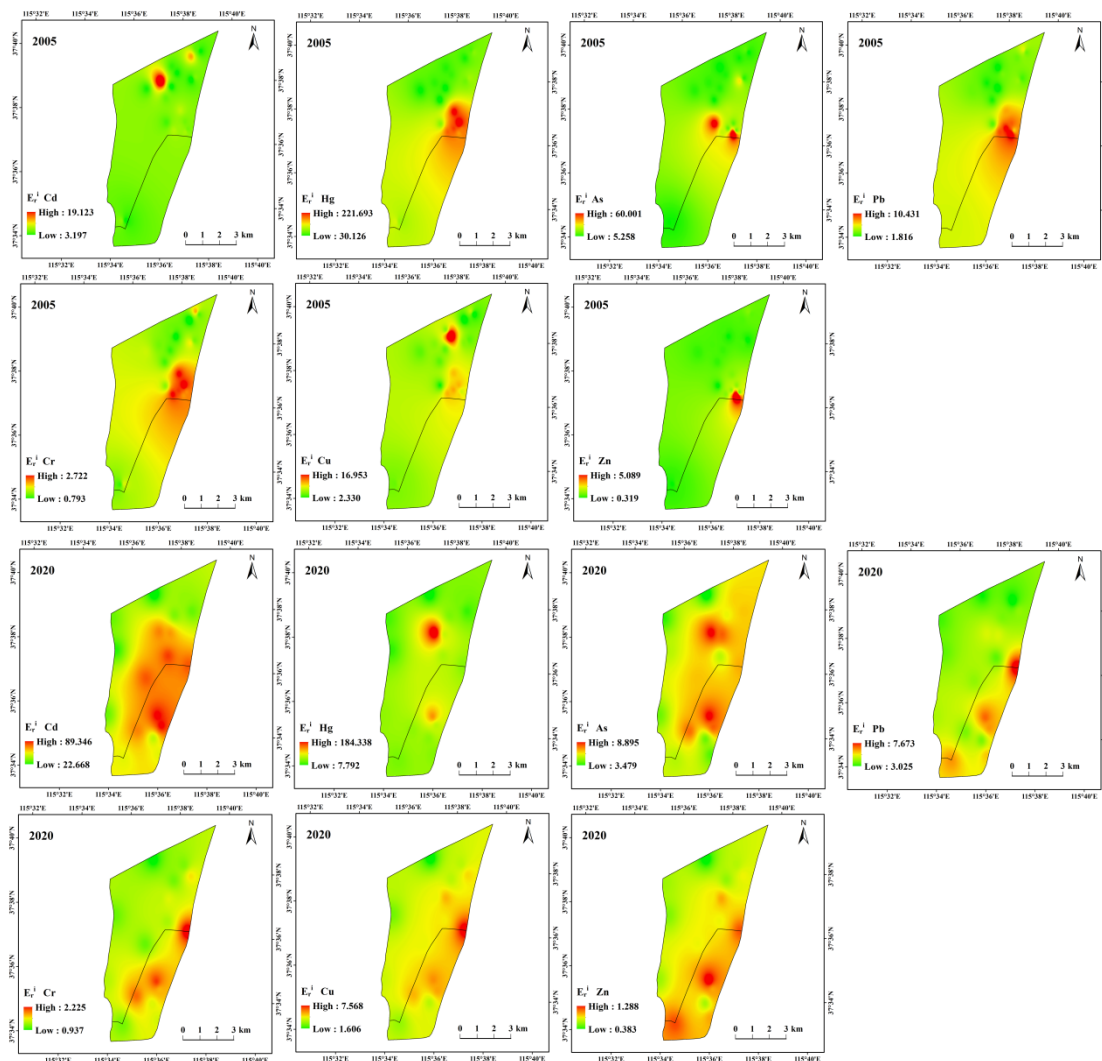

Figure S2. Distribution of risk factor for different heavy metal in Hengshui Lake.

Table S4. Index of the variables.

| Variable  | Meaning                                                                       |
|-----------|-------------------------------------------------------------------------------|
| RDA       | Redundancy analysis                                                           |
| IDW       | Inverse distance weighted                                                     |
| $P_i$     | Single factor pollution index                                                 |
| $P_n$     | Nemero comprehensive pollution index                                          |
| $C_i$     | The measured concentration of heavy metal                                     |
| $S_i$     | Standard value of heavy metal                                                 |
| EF        | Enrichment factor                                                             |
| $C_i/C_n$ | The concentration ratio of measured heavy metal i and reference heavy metal n |
| S         | Sample values                                                                 |
| B         | Background values                                                             |
| PRI       | Potential ecological risk index of multiple heavy metals                      |
| $E_i^i$   | Risk factor of heavy metal                                                    |
| $T_r^i$   | Toxic coefficient of heavy metal                                              |
| $C_i^B$   | Geochemical background value of heavy metal                                   |
| CV        | Coefficient of variation                                                      |
| VIFs      | Variance inflation factors                                                    |
| $R^2$     | Coefficient of determination                                                  |
